1 Toxoplasmodicidal *in vitro* effect of dehydroepiandrosterone on *Toxoplasma gondii*

2 extracellular tachizoytes

3

4 Saé Muñiz-Hernández<sup>1</sup>, Carmen T. Gómez de León<sup>2</sup>, Angélica Luna Nophal<sup>1,2</sup>, Lenin

5 Domínguez-Ramírez<sup>3</sup>, Olga-Araceli Patrón-Soberano<sup>4</sup>, Karen E Nava-Castro<sup>5</sup>, Pedro

6 Ostoa-Saloma<sup>2</sup>, and Jorge Morales-Montor<sup>2</sup>

7

8 <sup>1</sup>Laboratorio de Oncología Experimental, Subdirección de Investigación Básica,

9 Instituto Nacional de Cancerología, Secretaria de Salud, Ciudad de México, 14080,

10 México

11 <sup>2</sup>Departamento de Inmunología, Instituto de Investigaciones Biomédicas, Universidad

12 Nacional Autónoma de México, AP 70228, Ciudad de México, 04510, México.

13 <sup>3</sup>Departamento de Ciencias Químico-Biológicas, Escuela de Ciencias, Universidad de

14 las Américas Puebla, Santa Catarina Mártir, Cholula, Puebla, 72810, México.

15 <sup>4</sup>División de Biología Molecular, Instituto Potosino de Investigación Científica y

16 Tecnológica, Camino a la Presa San José 2055, Col. Lomas 4a. sección, San Luis

17 Potosí, 78216, México

18 <sup>5</sup>Laboratorio de Genotoxicología y Mutagénesis Ambientales, Departamento de

19 Ciencias Ambientales, Centro de Ciencias de la Atmósfera, Universidad Nacional

20 Autónoma de México. Ciudad de México, 04510, México.

21

22 Running Head: Toxoplasmodicide *in vitro* effect of DHEA

23

24 \*Corresponding author: Dr. Jorge Morales Montor. Departamento de Inmunología,

25 Instituto de Investigaciones Biomédicas, Universidad Nacional Autónoma de México.

26 AP 70228, México DF 04510, México.

27 E-mail: [jmontor66@biomedicas.unam.mx](mailto:jmontor66@biomedicas.unam.mx), [jmontor66@hotmail.com](mailto:jmontor66@hotmail.com)

28 Saé Muñiz-Hernández and Carmen T. Gómez de León contribute equally to this work.

29 Author order was determined on the basis of seniority.

30 Keywords: Toxoplasmosis, *Toxoplasma gondii*, tachyzoite, dehydroepiandrosterone, in

31 vitro, parasiticide effect, drug

32

33

34

35

36

37

38

39

40

41

42

43

44

45

46

47

48

49

50

51

## 52 **Abstract**

53 Toxoplasmosis is a zoonotic disease caused by the apicomplexa protozoan parasite  
54 *Toxoplasma gondii*. This disease is a health burden, mainly in pregnant women and  
55 immunocompromised individuals, in whom they can cause death. Despite advances in  
56 the medical area, nowadays there are no new drugs to treat toxoplasmosis. The standard  
57 therapy to toxoplasmosis has not had progress for last seven decades; it is a combination  
58 of sulfadiazine-pyrimethamine (S-P); which is co-administered with folic acid due to  
59 the adverse effects of the drug. Several studies have shown that the conventional  
60 treatment has limited effectiveness and severe adverse effects. Thus, the search of better  
61 treatments with greater efficacy and without the adverse effects becomes relevant. In the  
62 current work we demonstrate for the first time the parasitocidal effect of  
63 dehydroepiandrosterone (DHEA), a steroid hormone produced by many mammals, on  
64 extracellular tachyzoites (the infective stage of *T. gondii*). In vitro treatment with DHEA  
65 reduces the viability of extracellular tachyzoites, and both the active and passive  
66 invasion processes. The ultrastructural analysis of treated parasites showed that DHEA  
67 alters the cytoskeleton structures, leading in the lost of the organelle structure and  
68 organization, as well as, the lost of the cellular shape. On a molecular level, we  
69 observed an important reduction of the expression of several proteins that are essential  
70 for the motility and virulence of parasites when they were exposed to DHEA. These  
71 results suggest that DHEA could be used as an alternative treatment against  
72 toxoplasmosis.

73

74

75

76

## 77 **Introduction**

78 Toxoplasmosis is a zoonosis caused by the apicomplexa protozoan parasite,  
79 *Toxoplasma gondii*, which is able to infect all warm-blooded animals [1-2]. This is a  
80 worldwide disease with a prevalence average of 40 % [3]. Particularly, in Mexico the  
81 sero-prevalence goes from 40-70% depending on the region of the country [4-5]. *T*  
82 *gondii* infection can induce abortion, encephalitis, and in extremely cases, death. It is  
83 considered a major opportunistic pathogen in patients with AIDS [6-7].  
84 Human toxoplasmosis presents two phases: the acute and the chronic. In the acute  
85 phase, parasite disseminate in the tachyzoite stage, the highly invasive and motile  
86 asexual form. In this stage, parasite is able to cross any biological barrier, included the  
87 placenta or the blood-brain barrier [8-11]. If the host is immunocompetent tachyzoites  
88 will eventually differentiate into bradyzoites, the low replication form, and will begin  
89 the tissue cyst formation [12]; this event defines the chronic infection, since tissue cysts  
90 can stay forever in the host without provoking any apparent pathology [13].  
91 Tachyzoite stage has a characteristic half-moon shape and an approximate size of 5 to  
92 10  $\mu\text{m}$  [14], as all members of Apicomplexa family; its motility depends on actomyosin  
93 machinery that underlies the plasma membrane called glideosome [15]. *Toxoplasma*  
94 counts with three specialized secretory organelles with particular proteins, which are  
95 secreted in a controlled and specific manner during biological process, the micronemes  
96 (MIC protein), rhoptries (ROP proteins) and dense granules (GRA proteins) [16].  
97 *Toxoplasma* tachyzoite can carry out two types of invasion, active or passive. In the  
98 active invasion *Toxoplasma* is the effector cell, and is the most important process due to  
99 at majorly of the cell in the individuals are infected by mean this process. Firstly, the  
100 tachyzoite must adhere to plasma membrane of the host cell; then glides propelled by  
101 the glideosome that links to the host cell membrane via MIC2/MAP2 complex. It has

102 been described that parasite recognizes an unknown ligand of the host by its GPI-  
103 anchored surface antigens, known as SAGs. Then, micorneme protein AMA1 and RON  
104 proteins (RON2, RON4, RON5 and RON8) are secreted and a fusion of both plasma  
105 membranes, called moving junction (MJ) is established [13, 17-18]. Parasite twirls  
106 inside of the host cell at the same time that the PV is formed by the secretion of ROP  
107 and GRA proteins. Inside of the non-fusogenic PV, the parasite is replicated by  
108 endodiogeny, an asexual replication form, that from the boundaries of a mature mother  
109 parasite forms two daughters' cells [19-20].

110 Passive invasion occurs in all phagocytic cells, these being the effector cells for the  
111 process. First, the parasite adheres to the plasma membrane of a phagocytic activated  
112 cell, surrounded by the plasmatic membrane elongations and internalized towards the  
113 cytoplasm in a phagocytic vacuole [13]. Once inside, the parasite evades the immune  
114 response transforming the phagocytic vacuole in to a parasitophorous vacuole (PV) via  
115 the phosphorylation of the host Immune-Related GTPases (IRGs) via a complex that  
116 includes ROP and GRA proteins. This prevents their oligomerization and recruitment to  
117 the PVM leading in the inhibition of the vacuole lysis and parasite clearance by  
118 macrophages then parasite is able to replicate [13, 21-23].

119 Conventional therapy against toxoplasmosis consists of a mixture of sulfadiazine-  
120 pyrimethamine that was established in the 50's decade. Since then, minor advances have  
121 been made in the treatment of the zoonosis [24-26]. Although sulfadiazine –  
122 pyrimethamine are synergic it is known that they present severe side effects. Since  
123 pyrimetamine is a folic acid antagonist it has been associated with bone marrow toxicity  
124 while sulfadiazine causes hypersensitivity and allergic reactions up to 20% of  
125 population [27-28]. Besides than this conventional treatment has a limited effectiveness,  
126 mainly on chronic stage disease, there is not available vaccine for human use.

127 DHEA is a steroid hormone that is produced, from cholesterol, in the adrenal glands,  
128 gonads and brain, and is synthesized from pregnenolone by the action of the 17, 20-  
129 desmolase enzyme [29]. It is the most abundant hormone circulating in mammals and  
130 can also be a precursor of sexual steroids [30]. The sulphated form of DHEA is majorly  
131 found in blood circulation and the free DHEA form (the active form) is only the 3-5 %  
132 of the total concentration. Although DHEA is a hormone produced by the organism, it  
133 has been postulated for its therapeutic usage as a parasiticide agent. In vitro, low  
134 concentrations of DHEA inhibit proliferation, adhesion and motility of *Entamoeba*  
135 *histolytica* trophozoites, while high concentrations induce the lysis of the parasite [31].  
136 DHEA reduces 75% the reproduction of *Taenia crassiceps* cysticercus, in vitro; and in  
137 murine model infected with metacestodos of *Taenia* the parasitic charge was 50%  
138 reduced when mice were previously treated with the hormone [32]. In a toxoplasmosis  
139 acute infection model, DHEA was administrated, pre and pos-infection to  
140 immunosupressed mice; DHEA reduced mortality in a 65 % in the pre-treated mice and  
141 in a 50 % in post-treated mice; besides this treatment reduced the number of brain cysts  
142 in pre-treated infected mice in 90 % and in post-treated mice in 60 % when compared to  
143 the control [33]. The effect of estradiol and progesterone has been studied in  
144 extracellular tachyzoites of *T. gondii*, showing that estradiol exposure increases the  
145 intracellular calcium concentration via the acidic organelles, which increases the  
146 secretion of MIC2 and gliding motility in consequence. Progesterone exposure increases  
147 the intracellular calcium concentration via the neutral organelles, presenting a contrary  
148 effect than observed with estradiol exposure. Although these hormones are able to  
149 trigger the calcium signalling in *T. gondii* tachyzoites, none receptor has been reported  
150 so far [34].

151 The development and research of new drugs against toxoplasmosis is relevant; in the  
152 search of new therapies with practical application, our research group has studied the  
153 effect of sex steroid hormones on the immune response to different parasitic infections.  
154 In the present work, we assessed the effect of DHEA, alone or in combination with the  
155 conventional treatment S-P, on *Toxoplasma* extracellular tachyzoites. Our results  
156 suggest that DHEA could be recognized by a cytochrome b5 family heme/steroid  
157 binding domain-containing protein inducing a reduction of passive and active invasion  
158 by the modulation of the expression of proteins that are essential during the invasion  
159 process, as well as some virulence factors.

## 160 **Results**

### 161 **The treatment with DHEA decreases the viability of *Toxoplasma gondii*** 162 **extracellular tachyzoites.**

163 In order to know the effect of dehydroepiandrosterone hormone on the viability of  
164 *Toxoplasma* we exposed extracellular tachyzoites to increasing DHEA concentrations  
165 for 30 minutes and two hours. In viability assay, all micromolar concentrations used  
166 induced a considerable decrease in the parasite in both times tested. At 30 min, a  
167 decrease of between the 25 to 40 % was observed for the 1, 10, 50, 80, 100, 200 and  
168 400  $\mu\text{M}$  concentrations and the maximum effect was observed with 600  $\mu\text{M}$  of DHEA,  
169 which reduced the viability in approximately 55% (Fig 1A, grey bars). At two hours, a  
170 decrease of the viability of 45 % was observed for 1 and 200  $\mu\text{M}$  concentrations, and  
171 the maximum effect was observed for the 10, 100, 400 and 600  $\mu\text{M}$  concentrations that  
172 reduced viability in approximately 58 to 62 % (Fig 1A, white bars). These results  
173 suggest that the viability of extracellular tachyzoites of *Toxoplasma* is compromised  
174 when they are exposed to therapeutic concentrations of DHEA.

### 175 **The combined treatment with DHEA / S-P presents a greater diminution of the** 176 **viability of *Toxoplasma gondii* extracellular tachyzoites than the individual effect** 177 **of either treatment.**

178 There are the possibility of DHEA could be used as an auxiliary compound in the  
179 treatment against *Toxoplasma* infection, we tested the effect of the conventional  
180 treatment with S-P combined with DHEA. First, we used equal concentrations of both  
181 drugs at 30 minutes and two hours (Fig 1B). We observed a considerable diminution of  
182 the viability with 200  $\mu\text{M}$  concentration in both times tested. At 30 minutes, a decrease  
183 between the 40 to the 50 % of the viability was observed since 200, to 600  $\mu\text{M}$   
184 concentrations (Fig 1B, grey bars). The effect observed at 200  $\mu\text{M}$  resulted



185 approximately 10 % higher than the effect observed at the same concentration in the S-P  
186 treatment (Figs 1B and 1C, grey bars). In contrast, at two hours the parasite viability  
187 was reduced approximately 40 % with the same concentration (Fig 1B, white bars); this  
188 reduction are in concordance with reduction induced by DHEA alone; however, the S-P  
189 treatment have a better effect inducing a 20 % viability decreased (Figs 1A and 1c,  
190 white bars). All the other tested concentrations showed a similar effect (Fig 1B, white  
191 bars).

192 Parasites were also treated with a constant concentration of 10  $\mu$ M of DHEA combined  
193 with 600 or 800  $\mu$ M of S-P for 30 minutes and two hours. At 30 minutes, both  
194 combinations of concentrations showed a reduction of the viability of approximately 35  
195 % (Fig 1B, grey bars); this effect is similar for 10  $\mu$ M DHEA alone treatment. However,  
196 the conventional treatment (S-P) showed a better effect on viability that these modality  
197 of combination at 30 min (10  $\mu$ M DHEA/600 and 800  $\mu$ M S-P) (Fig 1A vs 1C, grey  
198 bars). At two hours, the effect for both combinations of concentrations is lower than  
199 individual treatments (Fig 1B vs 1C, white bars).

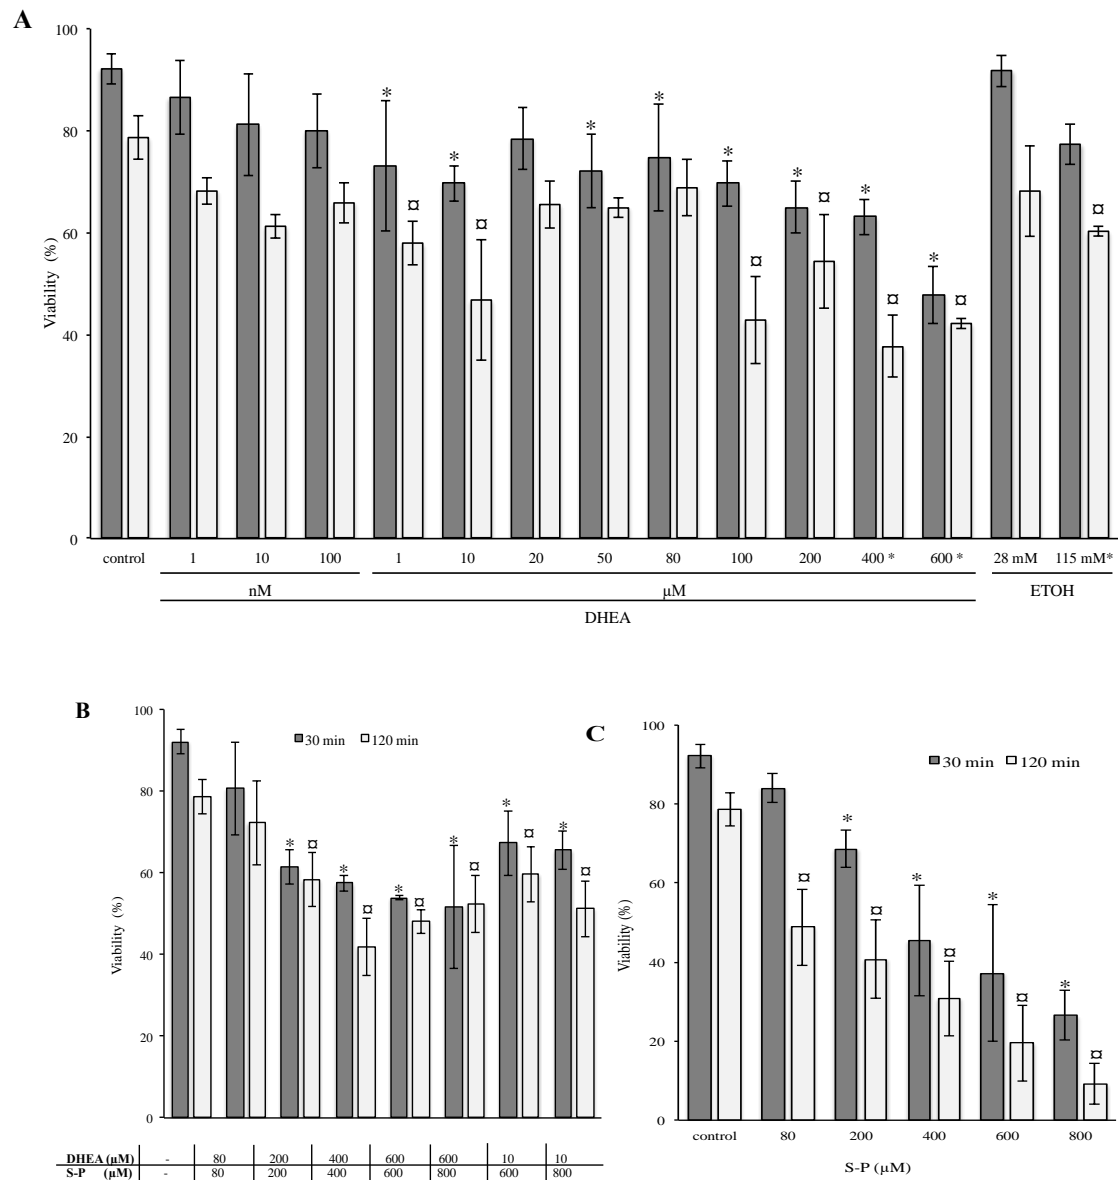

200

201 **Fig 1. Effect of DHEA on *T. gondii* extracellular tachyzoites viability.** A) DHEA B)

202 DHEA/S-P and C) S-P treatment, in X axis showed final concentration of each drug; in

203 Y axis = percentage of viability. Grey bars indicate 30 min and white bars correspond to

204 2 h of treatment. Control, tachyzoites without treatment in PBS; ETOH correspond to

205 DHEA solution vehicle (ethanol 2.8 and 11.5 μL / 100 μL; \* in Y axis, indicate the

206 concentration correspond to high quantity of ethanol used). (\*, ⊠) Statistical significance

207 compared to the control according to exposure time. P<0.0001

208

209 **The treatment with DHEA and DHEA/S-P reduces the active invasion process.**

210 After to treat the tachyzoites with DHEA and DHEA/S-P at several concentrations, we  
211 analyse if these parasites were capable to penetrate their human host cell. Hep-2 cells  
212 monolayers were exposed at pretreated tachyzoites during 30 min or 2 h (Fig 2). At 30  
213 min, the tachyzoite invasion capacity was inhibit in around 60% respect to the control  
214 without treatment, in almost all DHEA concentrations used (asterisks, Fig 2A, grey  
215 bars). While, tachyzoites pretreated for 2 h, exhibited a 70% approximately of decrease  
216 in invasion process when they were treated with 1, 200 or 400  $\mu$ M of DHEA, respect to  
217 the control without treatment. The maximum effect was observed with 600  $\mu$ M DHEA,  
218 reducing the active invasion in approximately 90 % vs tachyzoites without treatment  
219 (Fig 2A, white bars). While DHEA/S-P treatment, only presented significant  
220 differences, a decrease of around 50% at 600  $\mu$ M of both drugs for 30 min (Fig 2B, grey  
221 bars); and at 400  $\mu$ M DHEA/S-P for 2 h, reach approximately a diminution of the active  
222 invasion 75 % respect to the parasites without treatment (Fig 2B, white bars). The  
223 treatment of the extracellular tachyzoites with S-P had not significant differences in the  
224 active invasion independently the concentrations and times tested (Fig 2C).

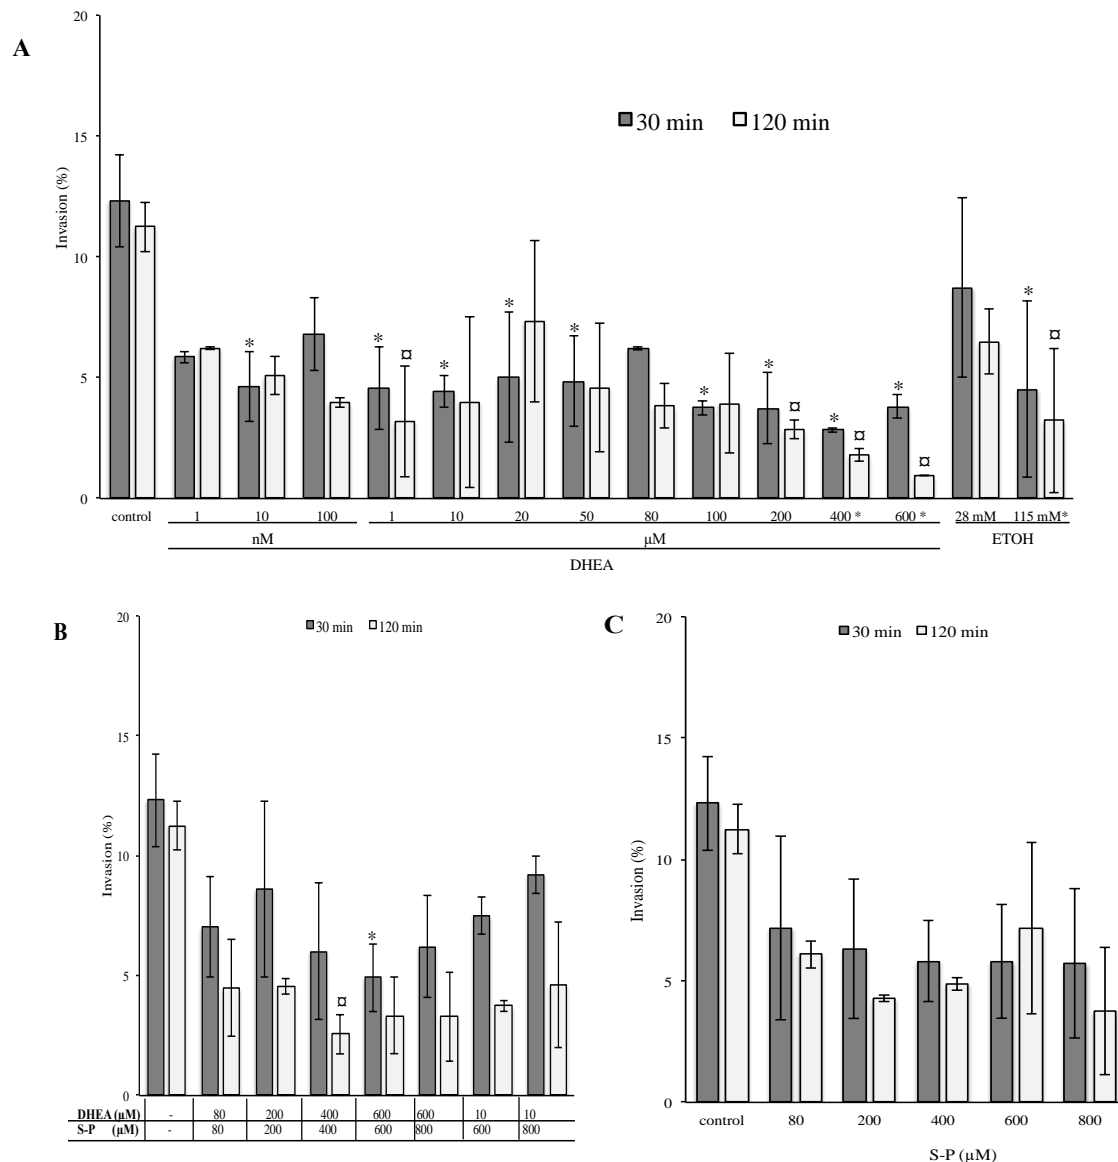

225

226 **Fig 2. Effect of DHEA in the active invasion process.** A) DHEA B) DHEA/S-P and  
 227 C) S-P treatment, X axis = final concentration of each drug; Y axis = percentage of  
 228 HEp-2 cells that contained at least one parasitophorous vacuole in the cellular  
 229 cytoplasm. Grey bars, 30 min and white bars, 2 h of treatment; control, PBS ETOH  
 230 correspond to DHEA solution vehicle (ethanol 2.8 and 11.5  $\mu\text{L}$  / 100  $\mu\text{L}$ ; \* in Y axis,  
 231 indicate the concentration correspond to high quantity of ethanol used). (\*,  $\boxtimes$ ) Statistical  
 232 significance compared to the control according to exposure time.  $P < 0.0001$

233

234

235 **The treatment with DHEA reduces the passive invasion process.**

236 *T. gondii* have the capacity to invaded all nucleated cells, to introduce at phagocytic  
237 cells like macrophages, it used the active machinery of the phagocytic cells themselves,  
238 this kind of invasion is called passive. In order to know if DHEA has an effect in this  
239 process we put together fresh macrophages with pretreated extracellular tachyzoites for  
240 30 min or 2 h (Fig 3). First, we compared the percentage of phagocytized untreated  
241 tachyzoites by LPS-activated macrophages against the percentage of phagocytized  
242 untreated tachyzoites by non-activated macrophages. Activated macrophages  
243 phagocytized approximately 40% more untreated tachyzoites compared with non-  
244 activated macrophages (Fig 3A, activated vs non-activated). For this reason we use  
245 activated macrophages for the consecutive assays. Passive invasion was reduced in  
246 approximately 35 % when activated macrophages were exposed to pretreated  
247 tachyzoites with 600  $\mu$ M DHEA for 30 min (Fig 3A, grey bars), and to pretreated  
248 tachyzoites with 80, 400 and 600  $\mu$ M DHEA for 2 h (Fig 3A, white bars). The  
249 combined (DHEA/S-P) and the conventional (S-P) treatments on extracellular  
250 tachyzoites have no effect in the passive invasion, independently of the concentrations  
251 and times (Fig 3B and 3C, respectively).

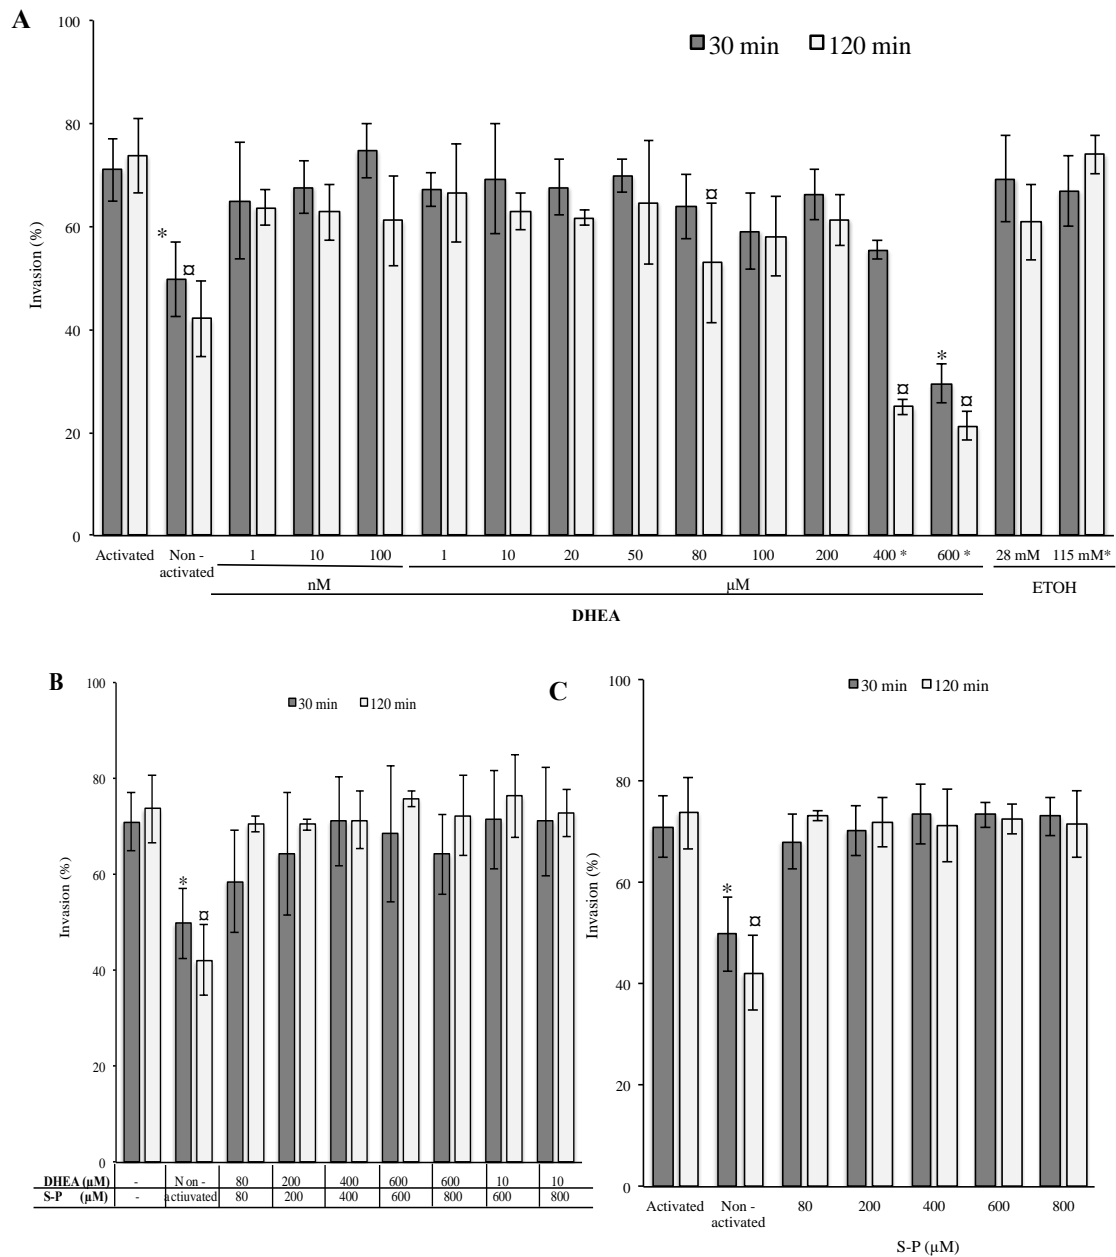

252

253 **Fig 3. Effect of DHEA in the passive invasion process.** A) DHEA B) DHEA/S-P and

254 C) S-P treatment, X axis = final concentration of each drug; Y axis = percentage of

255 macrophages that contained at least one PV in the cellular cytoplasm. Grey bars, 30 min

256 and white bars, 2 h of treatment; control, PBS ETOH correspond to DHEA solution

257 vehicle (ethanol 2.8 and 11.5 μL / 100 μL; \* in Y axis, indicate the concentration

258 correspond to high quantity of ethanol used). (\*, α) Statistical significance compared to

259 the control according to exposure time. P<0.0001

260

261 **Tachyzoites treated with DHEA and DHEA / S-P present morphological changes.**

262 We analysed if the decrement in invasion process could be related to morphological  
263 changes induced by the DHEA treatment on extracellular tachyzoites. The ultrastructure  
264 images of extracellular parasites treated as in the viability assay, for all concentrations  
265 of each treatment, DHEA and S-P alone and DHEA/S-P, were obtained by TEM (Figs 4  
266 and 5). The untreated and vehicle control (ethanol) tachyzoites, are showed in Fig 4A  
267 and 4B, respectively. The DHEA treatment at 10  $\mu\text{M}$  – 30 min, preserves all the typical  
268 structures such as micronemes, rhoptries, dense granules, nuclei and mitochondria.  
269 Interestingly, we were capable to observe the presence of granules apparently of  
270 amylopectin, which are exclusive of bradyzoite stage; and some areas of plasmatic  
271 membrane look wavy (Fig 4C). Importantly, the effect of DHEA on tachyzoites  
272 structure is related to the concentration and time used. At 100  $\mu\text{M}$  DHEA for 30 min,  
273 the parasites seem to lose their typical half-moon shape and some of them present  
274 amylopectin granules (Fig 4E). While with 400  $\mu\text{M}$  DHEA (30 min), parasites look a  
275 little swollen and present bigger amylopectin granules (Fig 4G). At 30 minutes with 600  
276  $\mu\text{M}$  DHEA, some parasites seem to preserve their half-moon shape, with a  
277 reorganization of the organelles and the presence of amylopectin granules; however, at  
278 this concentration of DHEA there are a greater amount of phantom structures in the  
279 samples (Fig 4I). Longer time of DHEA exposition induced greater changes in the  
280 extracellular tachyzoites morphology. Parasites exposure to 10 and 100  $\mu\text{M}$  of DHEA  
281 by two hours, showed an amoeboid shape with a totally lost of the intracellular  
282 organization and the apical polarity; the dense granules lost their circle shape and the  
283 presence of some amylopectin granules were observe to (Fig 4D and 4F). In the same  
284 time but exposure with 400 and 600  $\mu\text{M}$  of DHEA, parasites look inflated with a

285 balloon shape, although they seem to preserve organelles typical organization, as well as  
286 the apical polarity (Fig 4H and 4J).

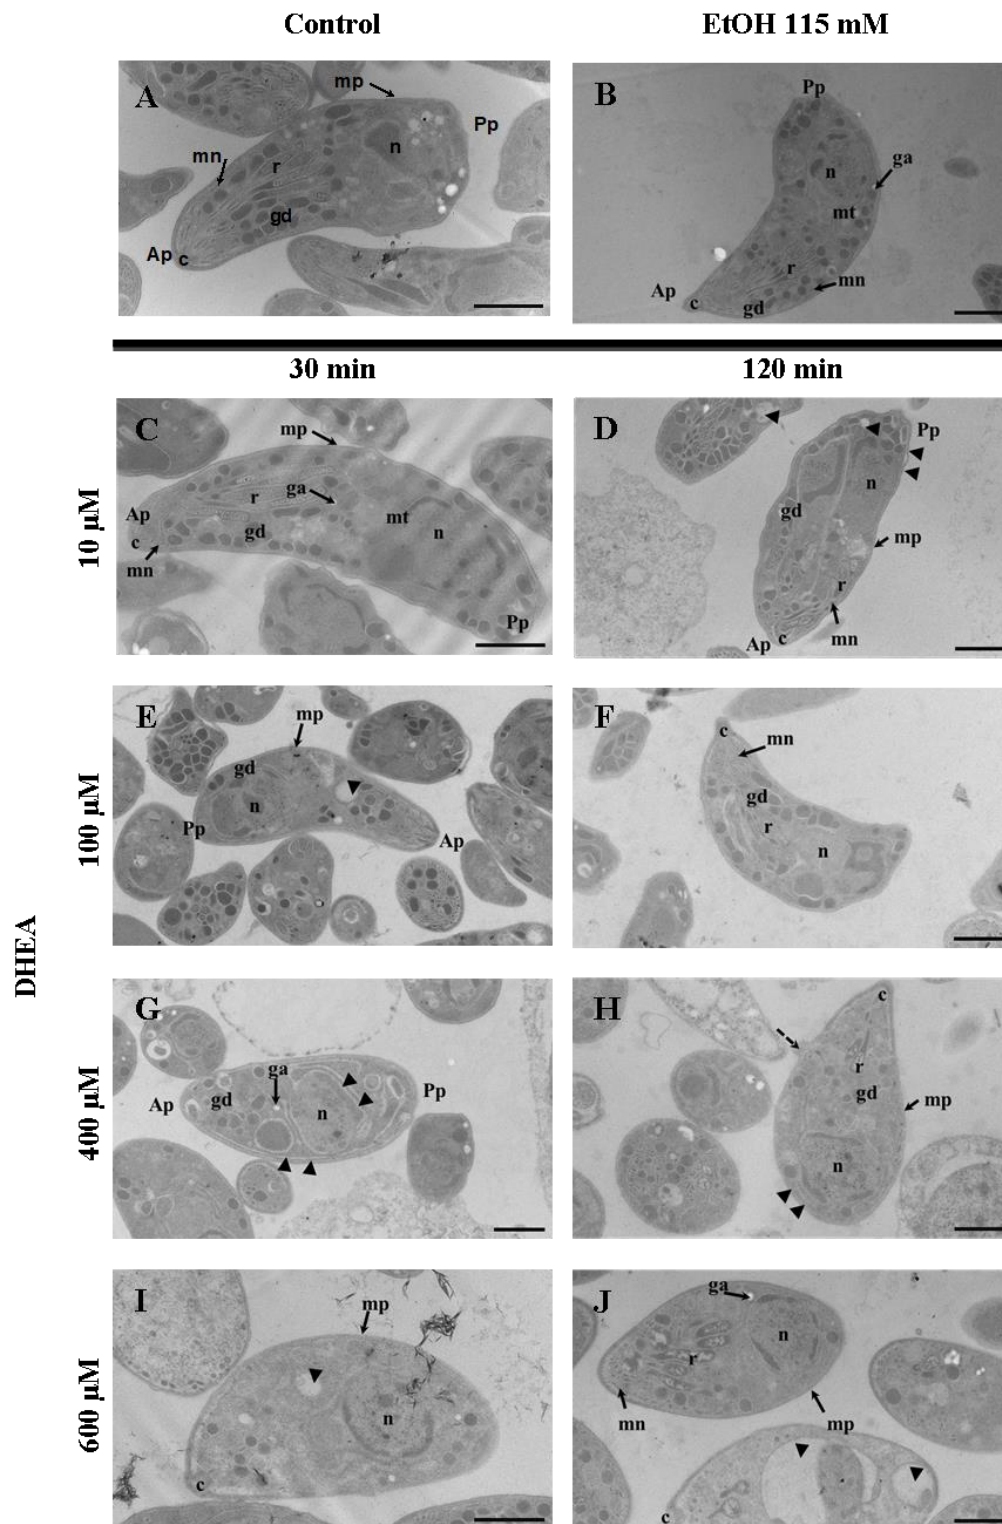

287

288 **Fig 4. Effect of DHEA in the ultrastructure of *Toxoplasma gondii* extracellular**  
289 **tachyzoites. A) Morphology of extracellular tachyzoites untreated and B) tachyzoites**



290 exposure to ethanol, corresponding at 2h of exposure. Extracellular tachyzoites  
291 exposure to C) 10  $\mu$ M, E) 100  $\mu$ M, G) 400  $\mu$ M and I) 600  $\mu$ M final concentration of  
292 DHEA for 30 min; or D) 10  $\mu$ M, F) 100  $\mu$ M, H) 400  $\mu$ M and J) 600  $\mu$ M final  
293 concentration of DHEA for 2 h.. c, conoid; r, rhoptries; mn, micronemes; gd, dense  
294 granules; ga, amylopectin granules; n, nuclei; m, plasma membrane; re, endoplasmic  
295 reticulum; mt, microtubules; Ap, apical pole; Pp, posterior pole Bars= 1  $\mu$ m.

296

297 In the combined treatment, DHEA/S-P at 10/800  $\mu$ M, 600/600  $\mu$ M and 600/800  $\mu$ M, the  
298 effect was observed since 30 min of exposure and it was consistent after 2 h (Fig 5). At  
299 10/800  $\mu$ M DHEA/S-P the parasites lose their typical shape and present amoeboid and  
300 elongated shape, they also start to lose the intracellular organization and present  
301 amylopectin granules (Fig 5A-B). At higher concentrations of DHEA/S-P 600/600  $\mu$ M,  
302 some parasites preserved the typical shape lose the organization of the organelles,  
303 finding the rhoptries at the posterior pole, the dense granules lost their circled shape,  
304 and they present amylopectin granules (Fig 5C-D). Finally, with 800/800  $\mu$ M of  
305 combined treatment, the appearance of tachyzoites was amorphous with loss of the  
306 organelles organization and again, presence of amylopectin granules (Fig 5E-F)  
307 The conventional treatment induced important changes in the extracellular tachyzoites,  
308 independently of concentration or time exposure. At 200 and 800  $\mu$ M of S-P for 30 min  
309 and 2 h, the tachyzoites loose their typical shape and was possible find tachyzoites with  
310 amoeboid, elongated or amorphous shape, they present amylopectin granules, loose the  
311 apical polarity and the organization of the organelles (Fig 5G-J).

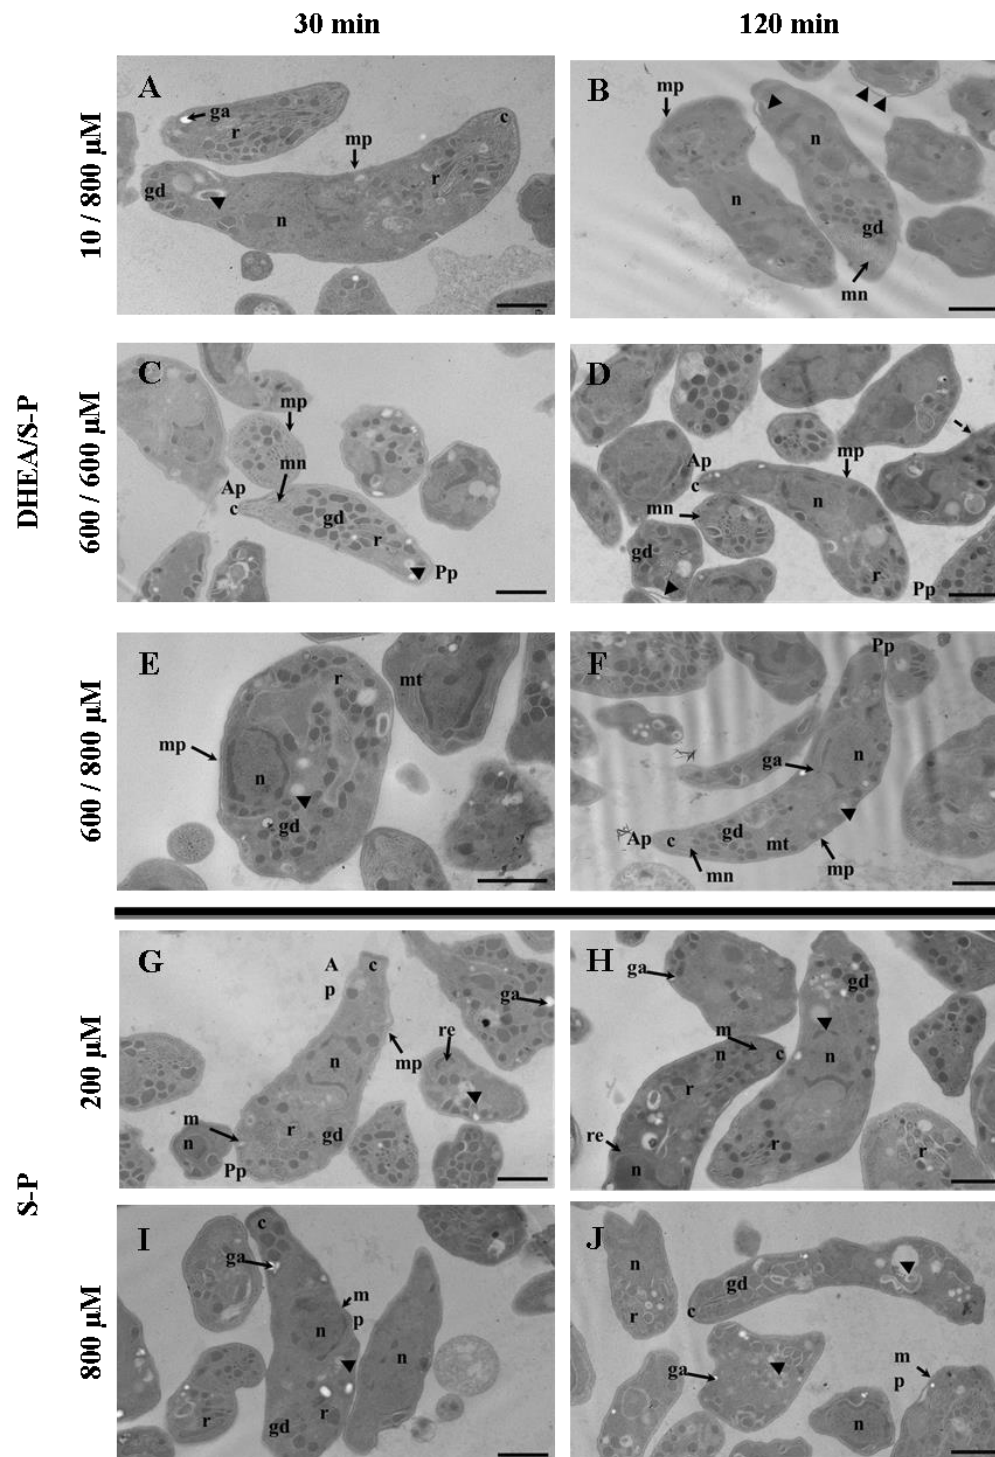

312

313 **Fig 5. Effect of DHEA / S-P in the ultrastructure of *Toxoplasma gondii***

314 **extracellular tachyzoites.** Extracellular tachyzoites treated with A) 10 / 800  $\mu$ M, B)

315 600 / 600  $\mu$ M, C) 600 / 800  $\mu$ M final concentration of DHEA / S-P, respectively for 30

316 minutes or D) 10 / 800  $\mu$ M, E) 600 / 600  $\mu$ M, F) 600 / 800  $\mu$ M final concentration of

317 DHEA / S-P, respectively for 120 minutes. c, conoid; r, rhoptries; mn, micronemes; gd,

318 dense granules; ga, amylopectin granules; n, nuclei; m, plasma membrane; mt,  
319 microtubules; Ap, apical pole; Pp, posterior pole. Bar = 1  $\mu$ m.

320 **Treatment with DHEA, S-P or DHEA / S-P induces changes in the protein**  
321 **expression since 30 minutes of exposure.**

322 To determine the effects that the treatments with DHEA, S-P and DHEA / S-P have at  
323 molecular level, we used in extracellular tachyzoites to compare the protein profile of  
324 the treated parasites against the protein profile of tachyzoites without treatment (Fig 6).  
325 The protein profile of the control exhibited 159 spots (Fig 6A); the group treated with  
326 DHEA 10  $\mu$ M for 30 min exhibited 165 spots, which 105 were match with control (Fig  
327 6B); the group treated with S-P 800  $\mu$ M for 30 min exhibited 126 spots, which 99 were  
328 match with control (Fig 6C); while the group treated with DHEA / S-P 10 / 800  $\mu$ M for  
329 30 min exhibited 213 spots, which 113 were match with control (Fig 6D). Protein  
330 profiles were analyzed as described in methods and materials section, and we selected  
331 the proteins that showed greater changes in their expression between the treatments and  
332 respect to the control. Thirty proteins were identified by its molecular weight and  
333 isoelectric point (Table 1), as described in methods and materials section, and were  
334 classified by their probable location (Fig 7A). We observed that most of the proteins  
335 that change their expression are dense granules proteins, followed by proteins from  
336 plasma membrane and cytoplasm (Fig 7A). Then, we graphed the proteins that  
337 diminishes their expression respect to the control (Fig 7B), and the proteins that  
338 maintain or increase their expression respect to the control (Fig 7C). We can observe  
339 that treatment with DHEA leads in a diminution of the expression of proteins from  
340 dense granules, micronemes, apicoplast, peroxisome, plasma membrane, mitochondria  
341 and cytoskeleton; while proteins from cytoplasm increases their expression (Fig 7 insets  
342 B and C, light grey bars). S-P treatment provokes the reduction in the expression of

343 proteins from dense granules, micronemes, cytoplasm, apicoplast, peroxisome, plasma  
344 membrane and mitochondria; and the increment of proteins from rhoptries, IMC and  
345 cytoskeleton (Fig 7 insets B and C, dark grey bars). Combined treatment with DHEA /  
346 S-P, induces a lower expression of proteins from dense granules, micronemes,  
347 cytoplasm, apicoplast and peroxisome; and a higher expression of proteins from  
348 rhoptries, plasma membrane and mitochondria (Fig 7 insets B and C, black bars).

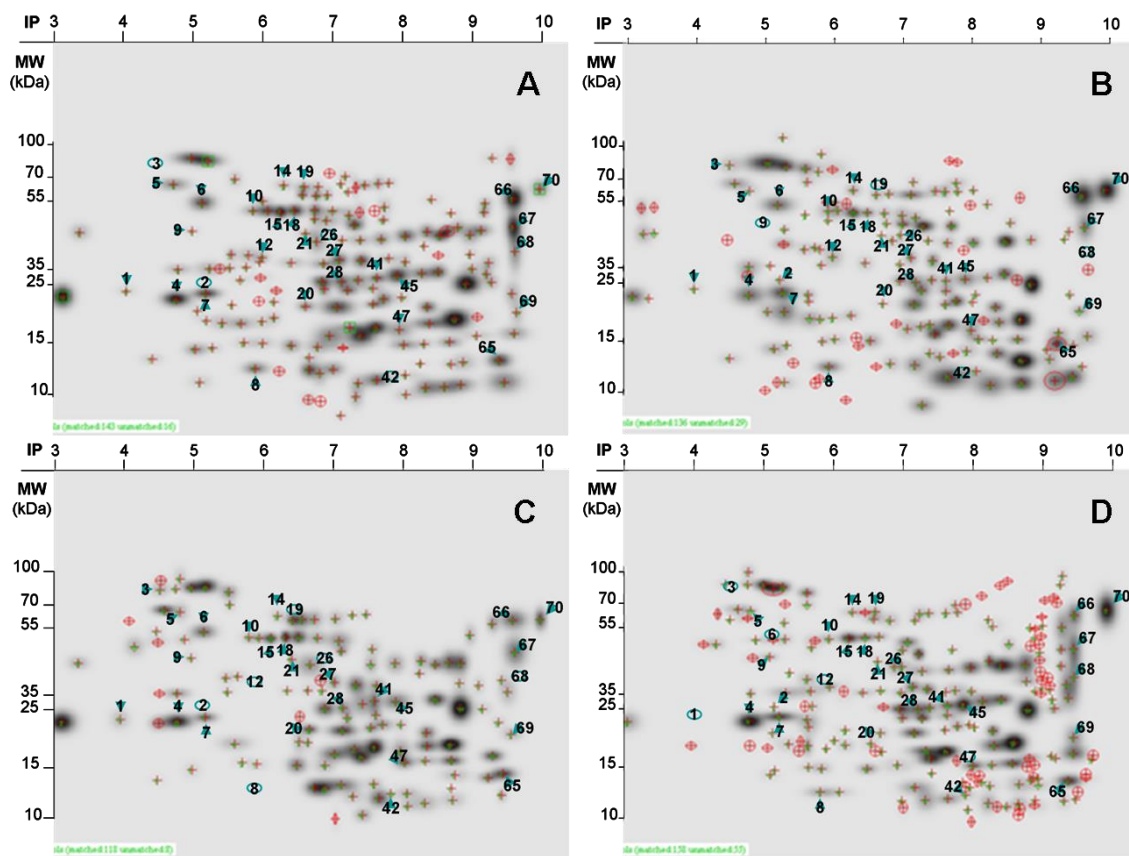

349  
350 **Fig 6. Proteomic profile of whole extract of extracellular tachyzoites.** 30 minutes of  
351 treatment with: A) Control without treatment; B) DHEA 10  $\mu$ M; C) S-P 800  $\mu$ M and D)  
352 DHEA / S-P 10 / 800  $\mu$ M. Arrowheads point out the spots (identified in table 1) that  
353 were identified in all treatments; the spots that are absent in treatments respect to the  
354 control are circled.

355

356

**Table 1. Protein differential expression in whole extract of extracellular tachyzoites**

| Spot number | Protein name                                                        | Uniprot KB ID | Theoretical Mr / IP | Experimental Mr / IP | Possible location          | Relative expression compared to the control |              |              |                       |
|-------------|---------------------------------------------------------------------|---------------|---------------------|----------------------|----------------------------|---------------------------------------------|--------------|--------------|-----------------------|
|             |                                                                     |               |                     |                      |                            | Ctrl                                        | DHEA (10 μM) | S-P (800 μM) | DHEA /S-P (10/800 μM) |
| 1           | Dense granule protein (GRA1)                                        | P13403        | 17.85 / 4.13        | 23 / 4.1             | Dense granules             | *                                           | *            | **           | —                     |
| 2           | Cytochrome b5 family heme/steroid binding domain-containing protein | A0A139XPA0    | 26.25 / 5.18        | 27 / 5.1             | Unknown                    | —                                           | *            | —            | *                     |
| 3           | Microneme protein (MIC2)                                            | O00816        | 82.61 / 4.45        | 84 / 4.5             | Micronemes                 | —                                           | **           | *            | —                     |
| 4           | Dense granule protein (GRA7)                                        | O00933        | 23.23 / 4.95        | 22.9 / 4.9           | Dense granules             | ***                                         | **           | ***          | ****                  |
| 5           | Microneme protein (MIC4)                                            | Q9XZH7        | 63.02 / 4.84        | 63 / 4.66            | Micronemes                 | ***                                         | *            | **           | *                     |
| 6           | Micronemal protein (MIC1)                                           | O00834        | 46.97 / 5.20        | 52.7 / 5.15          | Micronemes                 | ***                                         | **           | *            | —                     |
| 7           | Dense granule protein (GRA6)                                        | Q27003        | 24.02 / 5.47        | 23.5 / 5.35          | Dense granules             | ***                                         | **           | *            | ***                   |
| 8           | Dense granule protein (GRA5)                                        | Q07828        | 12.97 / 5.81        | 12.5 / 5.98          | Dense granules             | ***                                         | ***          | —            | **                    |
| 9           | Rhoptry protein (ROP1)                                              | A0A125YP48    | 47.99 / 4.9         | 45 / 4.99            | Rhoptries                  | *                                           | —            | **           | **                    |
| 10          | Enolase 2                                                           | Q9BPL7        | 48.29 / 5.67        | 53 / 5.71            | Cytoplasm                  | **                                          | **           | *            | *                     |
| 12          | Inosine-5'-monophosphate dehydrogenase                              | Q4VRV8        | 40.36 / 6.08        | 38.5 / 6.01          | Cytoplasm                  | *                                           | **           | —            | —                     |
| 14          | Rhoptry neck protein (RON4)                                         | B6KJ32        | 65.34 / 6.49        | 65.8 / 6.41          | Rhoptries                  | *                                           | **           | *            | **                    |
| 15          | Anamorfin homolog                                                   | B9Q0C2        | 47.56 / 6.49        | 53 / 6.38            | Cytoplasm and mitochondria | ****                                        | ***          | **           | ****                  |
| 18          | Elongation factor Tu                                                | Q9TMM9        | 44.31 / 6.52        | 52 / 6.5             | Apicoplast                 | ****                                        | *            | ***          | **                    |
| 19          | Peroxisomal catalase                                                | Q9XZD5        | 57.27 / 6.71        | 63 / 6.69            | Peroxisome                 | **                                          | —            | —            | *                     |
| 20          | Profilin                                                            | A0A086PNN0    | 20.78 / 6.51        | 21 / 6.7             | Cytoskeleton               | **                                          | *            | ***          | *                     |
| 21          | Gliding associated protein (GAP40)                                  | E0AE39        | 43.08 / 6.61        | 44 / 6.6             | Inner membrane complex     | **                                          | *            | **           | *                     |
| 26          | Acid phosphatase GAP50                                              | A0A086PXX7    | 46.60 / 6.95        | 46 / 6.97            | Inner membrane complex     | —                                           | *            | —            | **                    |
| 27          | Dense granule protein (GRA4)                                        | Q27002        | 34.08 / 7.19        | 36.5 / 7.12          | Dense granules             | ***                                         | *            | *            | **                    |
| 28          | Major surface antigen p30 (SAG1)                                    | P13664        | 29.80 / 6.84        | 26 / 7.1             | Plasma membrane            | ***                                         | **           | *            | ***                   |
| 41          | Rhomboid-like protease (ROM1)                                       | Q695U0        | 32.83 / 7.69        | 30 / 7.68            | Plasma membrane            | ***                                         | **           | ***          | **                    |
| 42          | Actin depolymerizing factor (ADF)                                   | A0A086PI60    | 12.94 / 7.92        | 12.5 / 7.8           | Cytoskeleton               | —                                           | —            | *            | *                     |
| 45          | Rhomboid-like protease (ROM3)                                       | Q6IU1Y        | 29.34 / 8.19        | 30 / 7.95            | Plasma membrane            | ***                                         | *            | **           | ****                  |
| 47          | Dense granule protein (GRA2)                                        | P13404        | 17.46 / 8.21        | 17 / 8.0             | Dense granules             | **                                          | **           | **           | —                     |
| 65          | 50S ribosomal protein L14                                           | Q9XQQ6        | 14.08 / 9.77        | 13.9 / 9.4           | Apicoplast                 | ***                                         | —            | **           | **                    |
| 66          | Rhomboid-like protease (ROM4)                                       | Q695T8        | 69.66 / 9.24        | 65.5 / 9.51          | Plasma membrane            | ****                                        | ***          | **           | **                    |
| 67          | Cytochrome b                                                        | O20672        | 41.59 / 9.25        | 46.5 / 9.51          | Mitochondria               | ***                                         | *            | **           | **                    |
| 68          | Phosphatidylserine decarboxylase proenzyme 1                        | Q1PCQ8        | 39.44 / 9.61        | 39 / 9.61            | Mitochondria               | **                                          | —            | —            | **                    |
| 69          | Dense granule protein (GRA3)                                        | B6KEU8        | 24.24 / 9.46        | 20 / 9.65            | Dense granules             | **                                          | *            | *            | ***                   |

|                                                                                                                                                                                                       |                                                           |            |               |           |           |   |     |    |      |
|-------------------------------------------------------------------------------------------------------------------------------------------------------------------------------------------------------|-----------------------------------------------------------|------------|---------------|-----------|-----------|---|-----|----|------|
| 70                                                                                                                                                                                                    | Diacylglycerol kinase catalytic domain-containing protein | A0A139XS45 | 69.58 / 10.02 | 63 / 9.97 | Cytoplasm | * | *** | ** | **** |
| Proteins were identified by molecular weight and isoelectric point using the program TagIdent in ExPASy web page ( <a href="https://web.expasy.org/tagident/">https://web.expasy.org/tagident/</a> ). |                                                           |            |               |           |           |   |     |    |      |

357

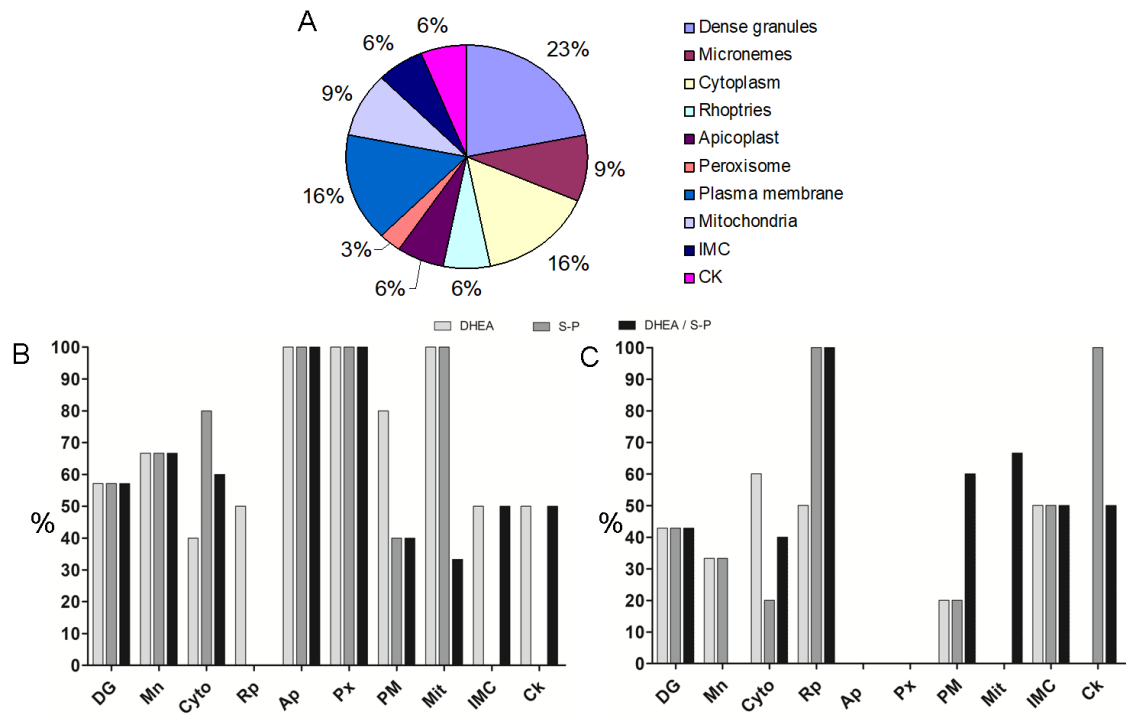

358

359 **Fig 7. Classification of proteins that exhibited differential expression.** A) Proteins  
 360 that change their expression after 30 minutes of treatment with DHEA 10  $\mu$ M, S-P 800  
 361  $\mu$ M or DHEA / S-P 10 / 800  $\mu$ M, grouped by their probable location. B) Percentage of  
 362 proteins that decrease their expression respect to the control without treatment (y axis).  
 363 C) Percentage of proteins that maintain or increase their expression respect to the  
 364 control without treatment (y axis). X axis, probable location; DG, dense granules; Mn,  
 365 micronemes; Cyto, cytoplasm; Rp, rhoptries; Ap, apicoplast; Px, peroxisome; PM,  
 366 plasma membrane; Mit, mitochondria; IMC, inner membrane complex; Ck,  
 367 cytoskeleton.

368

369



370 **Interaction of DHEA with the Cytochrome b5 family heme/steroid binding**

371 **domain-containing protein**

372 Interestingly the spot number 2, which exhibited an experimental molecular weight of  
373 27 KDa and isoelectric point of 5.1, and that is expressed only in the protein profile of  
374 tachyzoites treated with DHEA; was identified as a cytochrome b5 family heme/steroid  
375 binding domain-containing protein with a theoretical molecular weight of 26.25 KDa  
376 and isoelectric point of 5.18. The primary sequence of the protein was aligned in the  
377 NCBI web site with the BLAST program

378 ([https://blast.ncbi.nlm.nih.gov/Blast.cgi?PROGRAM=blastp&PAGE\\_TYPE=BlastSearch](https://blast.ncbi.nlm.nih.gov/Blast.cgi?PROGRAM=blastp&PAGE_TYPE=BlastSearch)

379 [h&LINK\\_LOC=blasthome](#)) and the protein was aligned with other steroid binding  
380 proteins from other Eukaryotes (S1 figure A-C), then we aligned only the domain  
381 section (aminoacids from 129 to 176) and the result was similar (S1 figure D-F).

382 The *T. gondii* model generated is the best that can be obtained given that the only  
383 available template has a 36.9% homology; this corresponds to the 111 residues located  
384 at the carboxyl-terminus of the full 243 residue protein. Most of the residues known to  
385 interact with the heme group in the PGRMC1 structure are identical in our predicted  
386 structure for *T. gondii* PGRMC. The resulting model has a heme group partially buried  
387 and contributing significantly to the binding of all of the ligands tested (Fig 8). In every  
388 case, the three best results for each ligand were in contact with the heme group on the  
389 surface of the protein. Notably, progesterone is the most tightly bound ligand followed  
390 by dehydroepiandrosterone, testosterone and 4-5 alpha dihydrotestosterone (Table 2).

391 Given that residue TYR158 (numbering based on the whole sequence cloned) provides  
392 the fifth coordination to the heme-iron, forcing ligand interaction to occur on the  
393 unoccupied side of the heme group.

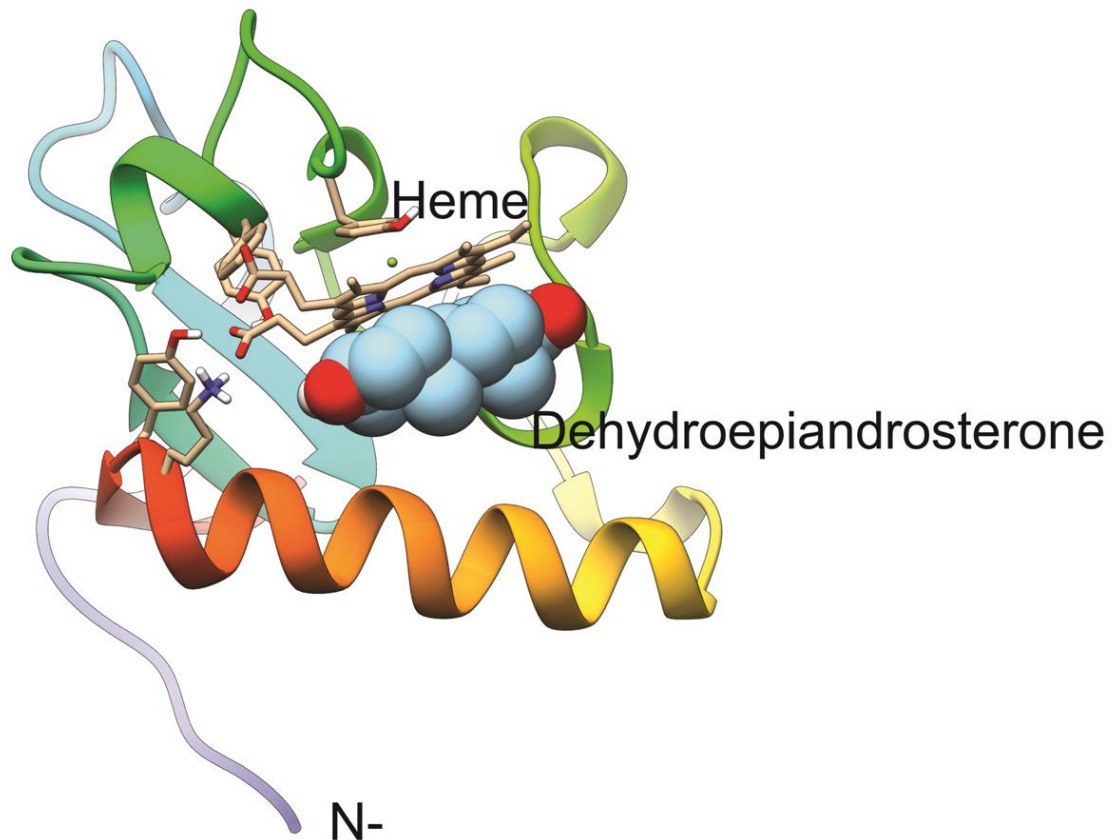

394

395 **Fig 8. Model for *T. gondii* PGRMC homolog and its docking to DHEA.** The model

396 for PGRMC contains a binding pocket for a heme group that functions as the binding

397 site for DHEA. TYR158 binds the heme group on one face while the other binds

398 DHEA, blocking any interaction at that site.

**Table 2. Ligands that present best affinities to TgPGRMC**

| Ligand      | Vina<br>kcal/mol |
|-------------|------------------|
| Octanoate   | -4.1             |
| Decanoate   | -4.4             |
| Dodecanoate | -4.6             |
| Myristate   | -5               |
| Palmitate   | -4.6             |
| Stearic     | -5.1             |
| Oleate      | -5.4             |
| Linoleate   | -5.5             |



|                                      |             |
|--------------------------------------|-------------|
| <b>DHEA</b>                          | <b>-7.4</b> |
| <b>4-5 alpha-Dihydrotestosterone</b> | <b>-7.4</b> |
| Aldosterone                          | -7.1        |
| Estriol                              | -7.2        |
| Cholesterol                          | -6.6        |
| <b>Progesterone</b>                  | <b>-7.6</b> |
| <b>Testosterone</b>                  | <b>-7.4</b> |
| Corticosterone                       | -6.8        |
| Beta-estradiol                       | -6.7        |
| Cortisol                             | -6.5        |
| Pyrimethamine                        | -5.9        |
| Sulfadiazine                         | -5.5        |

399 Pyrimethamine and sulfadiazine were also found to bind the heme group but with  
400 significantly lower affinity (bottom of Table 2). Given that these affinities are about 1.5  
401 kcal/mol lower, it is likely that they are non-specific as well as is the case for fatty acids  
402 included in the docking.  
403 It is unknown if *T. gondii* PGRMC is able to dimerize as its template (*Homo sapiens*  
404 PGRMC1), but the interactions with the ligands tested in the present work would block  
405 or compete a similar interaction.

## 406 **Discussion**

407 DHEA induces a decrement in the viability of extracellular tachyzoites at 100  $\mu\text{M}$  at  
408 both times tested (30 min and 2 h); even if effect was lower than the observed with  
409 standard therapy (S-P); results are similar to the obtained when trypomastigotes of *T.*  
410 *cruzi*, another intracellular parasite were treated with 128  $\mu\text{M}$  final concentration of  
411 DHEA combined with melatonin for 24 h [35]. Different to the standard treatment,  
412 whose response was directly proportional to the concentration, the effect obtained with  
413 DHEA exposure was independent on the concentration. This suggests that both drugs  
414 have different targets inside of the tachyzoite. In order to evaluate an accumulative  
415 effect of the DHEA with S-P we tested the combined treatment, resulting in a similar  
416 effect as the obtained when DHEA alone was administered. It is important to mention  
417 that previously reported DHEA parasiticide effect depends on the administration  
418 scheme, parasite lineage and experimental conditions.

419  
420 Once we determined that viability was affected by DHEA treatment, we assessed if the  
421 hormone has an effect in the invasion process, which is the most important biological  
422 process for the establishment and maintenance of the infection; as tachyzoites are able  
423 to infect phagocytic and non-phagocytic cells in two different mechanisms that has been  
424 defined as passive and active invasion, respectively, we determined the effect of the  
425 DHEA in both.

426 Tachyzoites reduced its ability to invade HEp-2 monolayers, when they were treated  
427 with DHEA; this reduction was higher than the observed with the conventional  
428 treatment with S-P. Differently to passive invasion, active invasion was reduced when  
429 parasites were treated with the DHEA / S-P combination at high concentrations,  
430 400/400  $\mu\text{M}$  at 30 minutes and 600/600  $\mu\text{M}$  at 2 h. During the active invasion,

431 *Toxoplasma* is the effector cell and the recognition of an unknown component in the  
432 plasma membrane of the host cell, is required; this event is determined by the GPI  
433 anchored proteins from *Toxoplasma*, being the SAG1 protein the most abundant in the  
434 plasma membrane of tachyzoites [13]. The expression of SAG1 was reduced in parasites  
435 that were treated with DHEA and S-P, while the parasites that were treated with DHEA  
436 / S-P maintain the expression of this protein similar to the control; is well known that  
437 SAG1 is not the only protein that act in this first process of attachment, due to the Sag1<sup>-</sup>  
438 mutants are still able to invade [13]. The motility is essential for the invasion and it  
439 depends of the glideosome complex; in this respect, several proteins that participate in  
440 the formation of the glideosome and in its correct function reduced its expression when  
441 parasites were treated with DHEA and DHEA / S-P, such as GAP40, profilin and  
442 ROM4. GAP40 protein act as an anchor for the rest of the glideosome complex [36]; the  
443 role of profilin is to sequester the G actin in order to enhance the polymerization, and it  
444 has been demonstrated to be essential for gliding motility and cell cycle in *Toxoplasma*  
445 [37]; and ROM4 is a rhomboid protease necessary for the cleavage of the complex  
446 MIC2 / AMA1 that is formed for the establishing of the MJ during the invasion process,  
447 the correct cleavage of the complex is required for correct reorientation of the parasite  
448 and gliding motility [38]. The reduction of the expression of these proteins could  
449 explain the diminution in the parasite ability for invade the Hep2 cells monolayers when  
450 are treated with DHEA or DHEA / S-P.

451 The analysis in primary cultures of macrophages revealed that high concentrations of  
452 DHEA affect the tachyzoites ability to establish in the cytoplasm of the phagocytic cell.  
453 In comparison with DHEA treatment, neither the conventional treatment with S-P, nor  
454 the combined treatment DHEA / S-P present significant differences, even when  
455 combined treatment reduced the extracellular viability. It has been proposed that

456 tachyzoites can transform the phagocytic vacuole into a parasitoforous vacuole by two  
457 different processes; the first includes the formation of the moving junction at the same  
458 time that the parasite is phagocytated, and the second proposal is that once the parasite  
459 has been phagocytated, is able to invade the phagolysosomal vacuole [13, 39]. Both  
460 proposals imply the fusion of the tachyzoite plasma membrane with the macrophage  
461 plasma membrane or with the phagolysosomal membrane; this mechanism involves the  
462 secretion of proteins from secretory organelles, such as MIC2 and RON4 [18]. In an  
463 interesting way, the protein MIC2 exhibited a higher expression when extracellular  
464 tachyzoites were exposure to DHEA, its expression was lower with the exposure to S-P  
465 and undetectable in both, the combined treatment and control; and the expression of  
466 RON4 was higher in the both treatments that include DHEA compared to the S-P  
467 treatment and the control (Table 1). It has been previously reported that extracellular  
468 tachyzoites that were exposure to progesterone, inhibit the secretion of MIC2 but didn't  
469 affect its expression [34]; this inhibition of the secretion leads on the inhibition of  
470 gliding motility. In this work we didn't collected the secretion products, but we must  
471 collect in future assays in order to determine if these proteins are secreted or not,  
472 nevertheless the increment of MIC2 could due to a failure on its secretion.

473 Complementary assays (not shown) revealed that even if the parasites were established  
474 inside of the macrophages, the evasion of the lysis was inhibited; this suggest that  
475 DHEA treatment could prevent the block of the phosphorylation of the host Immune-  
476 Related GTPases (IRGs) by ROP18 and GRA7 proteins from the parasite, diminishing  
477 its ability to escape of lysosomal degradation. Concordantly with this, the expression of  
478 GRA7 was reduced when parasites were treated with DHEA, while S-P treatment  
479 exhibited a similar expression to the control and in an unexpected way the combined  
480 treatment with DHEA / S-P increased the expression of the protein (Table 1). GRA7

481 interacts with the ROP18 kinase in a complex that targets the host IRGs mediating  
482 macrophage survival and acute virulence;  $\Delta$ GRA7 strain reduces the virulence in a half  
483 and the parasites can't evade the lysosomal degradation [40].

484

485 The effect of the DHEA in the structure of the extracellular tachyzoites resulted in the  
486 alteration of the plasmatic membrane structure, the organization of the organelles, the  
487 structure of the secretory organelles and cytoskeleton structures. At the higher  
488 concentrations (400 and 600  $\mu$ M) tested for 2 h, tachyzoites looked totally swollen;  
489 tachyzoites that were treated with S-P and DHEA / S-P, shown the same structure  
490 alterations, at lowest concentration and time tested, except for the swollen shape. The  
491 lost of the structure and location of secretory organelles when parasites were treated  
492 with DHEA, is consistently with the reduction in the invasion and in the ability to  
493 escape of the macrophage lysis; because both mechanisms depend on the secreted  
494 proteins from micronemes, rhoptries and dense granules; this effect is also related with  
495 the diminution in the expression of these proteins, as was previously discussed.  
496 Additionally, GRA3 expression was reduced when parasites were exposed to DHEA  
497 and S-P; recently was reported that GRA3 could has a role in the stabilization of the  
498 subpellicular cytoskeleton network, as  $\Delta$ GRA3 strain tachyzoites purified cytoskeletons  
499 lost the organization of this structure [41].

500

501 Another three proteins with differential expression regulation worth noting are of  
502 diacylglycerol kinase catalytic domain-containing protein, enolase 2 and a cytochrome  
503 b5 family heme/steroid binding domain-containing protein. The former, is a protein that  
504 is essential for the micronemes correct secretion [42]; this protein increases its  
505 expression in all three treatment schemes, as we didn't collect secretion products more

506 experiments should be achieved in order to determine the effect of the hormone in the  
507 function of this protein.

508 Enolase 2 besides of being specific of the tachyzoite stage, acts as a transcription factor  
509 during intracellular proliferation [43-44]; this protein maintains its expression similar to  
510 the control when parasites were expose to DHEA, while its expression was reduced  
511 with the S-P and DHEA / S-P treatment. We didn't identify proteins specific of  
512 bradyzoite stage, but would be interesting the search of some proteins in order to  
513 determine a possible transformation from tachyzoite to bradyzoite stage.

514 The later protein was expressed only in the parasites that were exposed to DHEA. Given  
515 its homology to PGRMC1 and 2, proteins known for their roles as progesterone  
516 receptors as well as interactions with the family of cytochromes P450 monooxygenase  
517 systems ([doi.org/10.3389/fphar.2017.00159](https://doi.org/10.3389/fphar.2017.00159)), it is not surprising to find it associated to a  
518 drug metabolism and response function in *T. gondii*. Interaction between this PGRMC  
519 homolog and DHEA could potentially block normal activating interactions with CYPs  
520 thus preventing the removal of the steroid. Thus, both the experiment in cells, as well as  
521 the molecular docking provides evidence for dehydroepiandrosterone to have a different  
522 target and effect than S-P.

523

524 Together our results suggest that DHEA can be proposed as a new treatment by itself or  
525 in a combined scheme with conventional treatments; however more experiments should  
526 be achieved in order to investigate its parasiticide effect *in vivo*.

527

528 **Conclusion**

529 DHEA parasiticide effect could be due to its interaction with the cytochrome b5 family  
530 heme/steroid binding domain-containing protein. DHEA treatment reduces the  
531 expression of proteins that are essential for the motility and virulence of RH strain  
532 tachyzoites and it is likely to block removal of DHEA by CYPs. This leads on an  
533 alteration of the ultrastructure of the parasites, the lost of the organelles organization,  
534 the lost of structure of the secretory organelles and of the cell shape. These alterations  
535 induce a reduction of the invasion ability of the tachyzoites to HEP-2 monolayers; a  
536 reduction of the ability to scape of the macrophage's lysis; and a reduction of the  
537 viability *in vitro*.  
538

## 539 **Materials and methods**

### 540 **Drugs, reagents and solutions**

541 The DHEA (Sigma chemical Co. Steinheim, Germany) was dissolved in anhydrous  
542 ethanol (Sigma chemical Co. Steinheim, Germany). The sulfadiazine-pyrimethamine  
543 was obtained in its commercial formulation (Bactropin ®, trimethoprim-  
544 sulfamethoxazole 160/800 mg).

### 545 **Animals**

546 Male Balb-C/Ann mice, between 6-8 weeks of age, used for parasite infection were  
547 maintained in a pathogen-free environment with regulates conditions of temperature,  
548 humidity and filtered air. Animals were fed with autoclaved food and water at libitum;  
549 and maintained according to the Mexican Federal Regulations for Animal Production,  
550 Care and Experimentation (NOM-062-ZOO-1999, Ministry of Agriculture; Mexico  
551 City, Mexico). All efforts to minimize animal suffering and to reduce the number of  
552 animals used were made.

### 553 **Maintenance and purification of *T. gondii* tachyzoites**

554 Tachyzoites of RH strain was maintained by intraperitoneal (ip) passages in Balb/cAnN  
555 mice. After cervical dislocation parasites were recovered from peritoneal exudates,  
556 washed with 1X PBS (138 mM NaCl, 1.1 mM K<sub>2</sub>PO<sub>4</sub>, 0.1 mM Na<sub>2</sub>HPO<sub>4</sub> and 2.7 mM  
557 KCl, pH 7.2) and purified by filtration through 5 µm pore polycarbonate membranes  
558 (Merck Millipore Co. Cork, Ireland).

### 559 **HEp-2 cell culture**

560 Hep-2 cells (CCL-23), derived from Human larynx epidermoid carcinoma epithelial  
561 cells were obtained from American Type Culture Collection (ATCC). The cellular  
562 culture was maintained in Minimal Essential Medium media (MEM, Gibco, Thermo



563 Fisher, NY, USA), supplemented with 8 % fetal bovine serum (FBS Gibco, Thermo  
564 Fisher, NY, USA) and 1 % PES, under 5 % CO<sub>2</sub> atmosphere at 37 °.

#### 565 **Murine macrophages culture**

566 Sterile mineral oil (1 mL) was inoculated in the peritoneum of male BalbC/AnN mice,  
567 after five days the mice were sacrificed and intraperitoneal macrophages were recovered  
568 using 1% glucose-PBS solution; macrophages were centrifuged and pellet was  
569 resuspended in Dulbecco's Modified Eagle Medium (DMEM, Gibco, Thermo Fisher,  
570 NY, USA), supplemented with 8% of fetal bovine serum (FBS) and 1% of penicillin-  
571 streptomycin (PES 10, 000 u/mL, Thermo Fisher, NY, USA). Macrophages were  
572 seeded over sterile coverslips in a ratio of 250 X 10<sup>3</sup> / cm<sup>2</sup> and they were maintained at  
573 5% CO<sub>2</sub> atmosphere at 37 °.

#### 574 **Macrophage activation**

575 Macrophages were washed with fresh DMEM 24 h after they were seeded.  
576 Lipopolysaccharides (LPS, Sigma chemical Co. Steinheim, Germany) were added at 30  
577 ng/mL final concentration for 1 h, in order to activate the macrophages. Then they were  
578 invaded with tachyzoites as described in "Invasion assays" section.

#### 579 **Viability of extracellular tachyzoites**

580 Purified parasites (6 X 10<sup>6</sup> cells) were exposure to increasing final concentrations of  
581 DHEA (1, 10 and 100 nM, and 1, 10, 20, 50, 80, 100, 200, 400 and 600 μM), of  
582 Sulfadiazine-Pirimetamine (80, 200, 400, 600 and 800 μM) and to combined treatment  
583 DHEA/ S-P (80/80, 200/200, 400/400, 600/600, 600/800, 10/600 and 10/800 μM), all  
584 drugs were diluted in PBS to final concentrations. The exposition was held for 0.5 or 2h  
585 at room temperature (RT) with gentle agitation. The ratio between live and death  
586 tachyzoites was measured by exclusion technique with trypan blue (4% Gibco, Thermo  
587 Fisher, NY, USA), 300 parasites were counted under an optical microscope

588 (AxioObserve Microscope, Carl Zeiss Mexico). This assay was realized by triplicate in  
589 at least three independent assays.

#### 590 **Invasion assays**

591 Hep-2 cells were grown on sterile coverslips in MEM medium supplemented with 8%  
592 SFB for 24h until the monolayer reach 80% confluence. Tachyzoites were pretreated  
593 with the same conditions that for viability assay. Then Hep-2 cells were exposed to  
594 tachyzoites pretreated, after 2h of interaction, samples were processed for optical  
595 microscopy analysis. Briefly, cells were fixed with 10% formaldehyde 30 min,  
596 permeabilized 5 min with 0.1% Triton-X100 and washed with 1X PBS. The samples  
597 were staining with haematoxylin – eosin solution (Merck Millipore KGaA, Darmstadt,  
598 Germany), washed with 50 % ethanol and slides were mounted with a PBS: Glycerol  
599 (1:1) solution. The invasion process was evaluated counting 300 total cells, we  
600 considered as invaded cells, every cell that presented at least one parasitophorous  
601 vacuole on their cytoplasm. Quantitative analysis was performed in an AxioObserve  
602 microscope (Carl Zeiss, Mexico). This assay was realized by triplicate in at least three  
603 independent assays.

#### 604 **Induction of changes in tachyzoites morphology by DHEA**

605 Extracellular tachyzoites treated with DHEA, S-P or DHEA / S-P at several  
606 concentrations, for 30 min or 2 h, were processed for Transmission Electron Microscopy  
607 (TEM). Briefly, tachyzoites were resuspended in 2.5 % glutaraldehyde in 1X PBS in  
608 gentle agitation for 1 h, washed with 1X PBS, fixed with 1 % OsO<sub>4</sub> 1 h, and contrasted  
609 with 1 % aqueous uranyl acetate 2 h. Samples were dehydrated in increasing  
610 concentrations of ethanol (50-100 %), then were embedded in crescents concentrations  
611 of LR White resin (London Resin, England, Electron Microscopy Sciences, USA) and  
612 polymerized at 4°C for 36 h under UV lamp. The samples were processed with a

613 ultramicrotome, serial cut were performed of around 10  $\mu\text{m}$  of thickness and mounted in  
614 a sample holder, the ultrastructural analysis was performed in a Transmission Electron  
615 Microscope JEM200CX 200KV (JEOL Co., Tokyo, Japan), image analysis was  
616 performed using the Digital Micrograph program (TM 3.7.0 for GSM 1.2 by the Gatan  
617 Software Team).

## 618 **2D SDS-PAGE**

619 Whole extract of, intact or treated parasites with DHEA (10  $\mu\text{M}$ ), S-P (800  $\mu\text{M}$ ) and  
620 DHEA / S-P (10 / 800  $\mu\text{M}$ ) for 30 minutes, was obtained by lysis in 2D sample buffer;  
621 extracts were centrifuged at 10 000 rpm, soluble fractions were quantified in a  
622 Nanodrop<sup>TM</sup> 2000 (Thermo Scientific) at 280 nm. 100  $\mu\text{g}$  of whole extracts, contained  
623 in 125  $\mu\text{L}$  of rehydration buffer, were load on Immobiline<sup>TM</sup> DryStrip pH 3-10, 7 cm  
624 strips (GE Healthcare).

625 After 16 h of passive rehydration, isoelectric focus was performed in a Protean IEF  
626 Cell (Bio-Rad Laboratories, Firmware Version: 1.80) by the supplier specifications.  
627 Strips were equilibrated in an equilibrium buffer (6 M urea, 0.375 M Tris-HCl pH 8.8,  
628 2% SDS, 20% glycerol) with 0.5% dithiothreitol (DTT) for 10 min, and then with  
629 equilibrium buffer with 2.5 % iodoacetamide (IAA) for 10 min; strips were loaded in  
630 polyacrylamide precast gels (Mini-PROTEAN<sup>®</sup>TGXTM Precast Gels 4-20%, Bio-Rad)  
631 and electrophoresis was performed at 100 V; then gel were stained with silver nitrate  
632 and scanned in a HP Scanjet G4050 scanner.

## 633 ***In silico* analysis of 2D SDS-PAGE**

634 Images were analyzed in the PDQuest Advanced-8.0.1 program. We determined the  
635 spots number for each condition, and then we matched all gels using the control as  
636 reference, in order to obtain the matched spots between conditions, their relative  
637 expression, as well as, their isoelectric point (IP) and molecular weight (Mr). The spots

638 that exhibited differential expression between treatments were identified by its  
639 molecular weight and isoelectric point using the TagIdent program of ExPASy portal  
640 (<https://web.expasy.org/tagident/>).

#### 641 **Modelling, docking and molecular dynamics of the cytochrome b5 family** 642 **heme/steroid binding domain-containing protein**

643 Initial model generation was accomplished by using the cloned sequence for  
644 *Toxoplasma gondii* PGRMC and submitting it to Rosetta Homology modeling [45].  
645 Resulting models clustered close together for the selection of the best model. However,  
646 since the template is a PGRMC1 protein in complex with a heme group (PDB ID  
647 4X8Y) [46], these models were refined using UCSF Chimera-Modeller plugin [47-48].  
648 Then, their quality was evaluated using Molprobitry [49]. The highest quality model was  
649 selected to perform ligand docking. Blind docking was performed using Vina 1.1.2 on  
650 the LNS supercomputer. All ligands were obtained from the ZINC database and  
651 converted to PDBQT format using the GUI provided by Autodock Tools. The receptor  
652 was kept rigid during docking. Docking employed a grid of dimensions 40 x 40 x 40  
653 with a 1 Å grid size. Exhaustiveness was always set to 1000. Analysis of the docking  
654 results was performed in UCSF Chimera. The results presented in Table are the best  
655 candidates selected from the consensus score the three best results.

#### 656 **Statistical analysis**

657 Statistical analysis was performed with a variance analysis (ANOVA) of two ways that  
658 allowed determined simultaneity the effect of two variables (treatment and exposition  
659 time) with the tukey comparation prove. We use the program GraphPad Prism 6,  
660 analysis was considered significative different when  $p < 0.05$ .

661

662

663

664 **Acknowledgements**

665 Financial support: This Project was partially supported by Instituto Nacional de  
666 Cancerología (SMH). Angélica Luna Nophal was supported by a fellowship from  
667 Consejo Nacional de Ciencia y Tecnología (CONACyT) - Mexico No. 300434. Grant  
668 IN-209719 from Programa de Apoyo a Proyectos de Innovación Tecnológica (PAPIIT),  
669 Dirección General de Asuntos del Personal Académico (DGAPA), Universidad  
670 Nacional Autónoma de México (UNAM) and Grant FC2016-2125 from Fronteras en la  
671 Ciencia, Consejo Nacional de Ciencia y Tecnología (CONACYT), both to Jorge  
672 Morales-Montor. Grant # IT-200120 to Pedro Ostoa-Saloma and Grant # IA202919 to  
673 Karen E Nava-Castro, both are from PAPIIT, DGAPA, UNAM. Carmen T. Gómez de  
674 León is recipient of a Post-Doctoral fellowship from Grant FC2016-2125 from  
675 Fronteras en la Ciencia, Consejo Nacional de Ciencia y Tecnología (CONACYT).  
676 Authors acknowledge to Ricardo Hernández Ávila from the IIB, UNAM, for his  
677 available technical assistance.

678 **Competing financial interests**

679 The authors declare no competing financial interests.

680 **Data availability**

681 The datasets generated and analyzed during the current study are available from the  
682 corresponding author on reasonable request.

683 **Author contributions**

684 Saé Muñoz-Hernández: Methodology, conceptualization, project administration and  
685 writing.

686 Carmen T. Gómez-de León: Experimentation, data analysis and writing.

687 Angélica Luna Nophal: Experimentation.

688 Lenin Domínguez-Ramírez: Experimentation, data analysis and writing.

689 Olga Araceli Patrón Soberano: Experimentation and data analysis

690 Karen E Nava-Castro: Data analysis.

691 Pedro Ostoa-Saloma: 2D SDS-PAGE methodology and resources

692 Jorge Morales-Montor: Writing (review and editing), data analysis and resources.

693

694

695

696

697

698

699

700

701

702

703

704

705

706

707

708

709

710

711

712

713

## 714 **References**

- 715 1. Weiss LM, Dubey JP. 2009. Toxoplasmosis: A history of clinical observations. *Int J*  
716 *Parasitol.* 39(8):895-901.
- 717 2. Ferguson DJ. 2009. *Toxoplasma gondii*: 1908-2008, homage to Nicolle, Manceaux  
718 and Splendore. *Mem Inst Oswaldo Cruz.* 104(2):133-148.
- 719 3. Elmore SA, Jones JL, Conrad PA, Patton S, Lindsay DS and Dubey JP. 2010.  
720 *Toxoplasma gondii*: epidemiology, feline clinical aspects, and prevention. *Trends*  
721 *Parasitol.* 26(4):190-6.
- 722 4. Caballero-Ortega H, Uribe-Salas FJ, Conde-Glez CJ, Cedillo-Pelaez C, Vargas-  
723 Villavicencio JA, Luna-Pastén H, Cañedo-Solares I, Ortiz-Alegría LB, Correa D. 2012.  
724 Seroprevalence and nacional distribution of human toxoplasmosis in Mexico: análisis of  
725 the 2000 and 2006 National Health Surveys. *Trans R Soc Trop Med Hyg.* 106(11):653-  
726 9.
- 727 5. Hernández-Cortazar I, Acosta-Viana KY, Ortega-Pacheco A, Guzman-Marin Edel S,  
728 Aguilar-Caballero AJ, Jiménez-Coello M. 2015. Toxoplasmosis in Mexico:  
729 epidemiological situation in humans and animals. *Rev Inst Med Trop Sao Paulo.*  
730 57(2):93-103.
- 731 6. Montoya JG, Liesenfeld O. 2004. Toxoplasmosis. *Lancet.* 363(9425):1965–76.
- 732 7. Safarpour H, Cevik M, Zarean M, Barac A, Hatam-Nahavandi K, Rahimi MT,  
733 Bannazadeh Baghi H, Koshki TJ, Pagheh AS, Shahrivar F, Ebrahimi M, Ahmadpour E.  
734 2020. Global status of *Toxoplasma gondii* infection and associated risk factors in people  
735 living with HIV. *AIDS.* 34 (3):469-474.
- 736 8. Hampton MM. 2015. Congenital Toxoplasmosis: A Review. *Neonatal Netw.*  
737 34(5):274-8.
- 738 9. Gómez-Chávez F, Cañedo-Solares I, Ortiz-Alegría LB, Flores-García Y, Luna-Pastén  
739 H, Figueroa-Damián R, Mora-González JC, Correa D. 2019. Maternal Immune  
740 Response During Pregnancy and Vertical Transmission in Human Toxoplasmosis. *Front*  
741 *Immunol.* 10:285.
- 742 10. Basit KA, Nasir S, Vohra E, Shazlee MK. 2018. Toxoplasmosis in an  
743 Immunocompetent Patient. *Pak J Med Sci.* 34(6):1579-1581.
- 744 11. Arshadi M, Akhlaghi L, Meamar AR, Alizadeh Ghavidel L, Nasiri K, Mahami-  
745 Oskouei M, Mousavi F, Rampisheh Z, Khanmohammadi M, Razmjou E. 2019. Sero-  
746 molecular detection, multi-locus genotyping, and clinical manifestations of ocular

- 747 toxoplasmosis in patients in northwest Iran. *Trans R Soc Trop Med Hyg.* 113(4):195-  
748 202.
- 749 12. Lyons RE, McLeod R, Roberts CW. 2002. *Toxoplasma gondii* tachyzoite-  
750 bradyzoite interconversion. *Trends Parasitol.* 18(5):198-201.
- 751 13. Black MW, Boothroyd JC. 2000. Lytic cycle of *Toxoplasma gondii*. *Microbiol mol*  
752 *biol rev.* 64(3):607-23.
- 753 14. Nichols BA, Chiappino ML. 1987. Cytoskeleton of *Toxoplasma gondii*. *J Protozool.*  
754 34(2):217-26.
- 755 15. Frénal K, Dubremetz JF, Lebrun M, Soldati-Favre D. 2017. Gliding motility powers  
756 invasion and egress in Apicomplexa. *Nat Rev Microbiol.* 15(11):645–660.
- 757 16. Carruthers VB, Sibley LD. 1997. Sequential protein secretion from three distinct  
758 organelles of *Toxoplasma gondii* accompanies invasion of human fibroblasts. *Eur J Cell*  
759 *Biol.* 73(2):114-23.
- 760 17. Paing MM, Tolia NH. 2014. Multimeric assembly of host-pathogen adhesion  
761 complexes involved in apicomplexan invasion. *PLoS Pathog.* 10(6):e1004120.
- 762 18. Guérin A, Hajj HE, Penarete-Vargas D, Besteiro S, Lebrun M. 2017. RON4<sub>L1</sub> is a  
763 new member of the moving junction complex in *Toxoplasma gondii*. *Sci Rep.*  
764 7(1):17907.
- 765 19. Beck JR, Fung C, Straub KW, Coppens I, Vashisht AA, Wohlschlegel JA, Bradley  
766 PJ. 2013. A *Toxoplasma* palmitoyl acyl transferase and the palmitoylated armadillo  
767 repeat protein TgARO govern apical rhoptry tethering and reveal a critical role for the  
768 rhoptries in host cell invasion but not egress. *PLoS Pathog.* 9(2):e1003162.
- 769 20. Blader IJ, Coleman BI, Chen CT Gubbels MJ. 2015. Lytic Cycle of *Toxoplasma*  
770 *gondii*: 15 Years Later. *Annu Rev Microbiol.* 69: 463-85.
- 771 21. Fleckenstein MC, Reese ML, Könen-Waisman S, Boothroyd JC, Howard JC,  
772 Steinfeldt T. 2012. A *Toxoplasma gondii* pseudokinase inhibits host IRG resistance  
773 proteins. *PLoS Biol.* 10(7):e1001358.
- 774 22. Haldar AK, Saka HA, Piro AS, Dunn JD, Henry SC, Taylor GA, Frickel EM,  
775 Valdivia RH, Coers J. 2013. IRG and GBP host resistance factors target aberrant, "non-  
776 self" vacuoles characterized by the missing of "self" IRGM proteins. *PLoS Pathog.*  
777 9(6):e1003414.
- 778 23. Hakimi MA, Olias P, Sibley LD. 2017. *Toxoplasma* Effectors Targeting Host  
779 Signaling and Transcription. *Clin Microbiol Rev.* 30(3):615-645.



- 780 24. Eyles DE, Coleman N. 1953. Synergistic effect of sulfadiazine and daraprim against  
781 experimental toxoplasmosis in the mouse. *Antibiot Chemother (Northfield)*. 3(5):483-  
782 90.
- 783 25. Eyles DE, Coleman N. 1955. An evaluation of the curative effects of pyrimethamine  
784 and sulfadiazine, alone and in combination, on experimental mouse toxoplasmosis.  
785 *Antibiot Chemother (Northfield)*. 5(10):529-39.
- 786 26. Neville AJ, Zach SJ, Wang X, Larson JJ, Judge AK, Davis LA, Vennerstrom JL,  
787 Davis PH. 2015. Clinically Available Medicines Demonstrating Anti-Toxoplasma  
788 Activity. *Antimicrob Agents Chemother*. 59 (12), 7161-9
- 789 27. Caumes E, Bocquet H, Guermonprez G, Rogeaux O, Bricaire F, Katlama C,  
790 Gentilini M. 1995. Adverse cutaneous reactions to pyrimethamine/sulfadiazine and  
791 pyrimethamine/clindamycin in patients with AIDS and toxoplasmic encephalitis. *Clin*  
792 *Infect Dis*. 21(3):656-8
- 793 28. Wei HX, Wei SS, Lindsay DS, Peng HJ. 2015. A Systematic Review and Meta-  
794 Analysis of the Efficacy of Anti-Toxoplasma gondii Medicines in Humans. *PLoS One*.  
795 10(9):e0138204.
- 796 29. Rutkowski K, Sowa P, Rutkowska-Talipska J, Kurylczyn-Moskal A, Rutkowski R.  
797 2014. Dehydroepiandrosterone (DHEA): hypes and hopes. *Drugs*. 74(11):1195-207.
- 798 30. Kamin HS, Kertes DA. 2017. Cortisol and DHEA in development and  
799 psychopathology. *Horm Behav*. 89:69-85.
- 800 31. Carrero JC, Cervantes C, Moreno-Mendoza N, Saavedra E, Morales-Montor J,  
801 Laclette JP. 2006. Dehydroepiandrosterone decreases while cortisol increases in vitro  
802 growth and viability of *Entamoeba histolytica*. *Microbes Infec*. 8(2):323-31.
- 803 32. Vargas-Villavicencio JA, Larralde C, Morales-Montor J. 2008. Treatment with  
804 dehydroepiandrosterone *in vivo* and *in vitro* inhibits reproduction, growth and viability  
805 of *Taenia crassiceps* metacestodes. *Int J Parasitol*. 38(7):775-81
- 806 33. Khalifa AM, Ibrahim IR, EI-Kerdany ED. 2000. Coccidial infection in  
807 immunosuppressed mice: prophylaxis and treatment with dehydroepiandrosterone. *East*  
808 *Mediterr Health J*. 6(5-6):908-18.
- 809 34. Zhang X, Zhang H, Fu Y, Liu J, Liu Q. 2018. Effects of Estradiol and  
810 Progesterone-Induced Intracellular Calcium Fluxes on *Toxoplasma gondii* Gliding,  
811 Microneme Secretion, and Egress. *Front microbiol*. 9:1266.
- 812 35. Kuehn CC, Rodriguez OLG, Domingues SC, Silva FD, Alonso TMP, de  
813 Albuquerque S, do Prado Jr JC. 2009. Melatonin and dehydroepiandrosterone

- 814 combination: does this treatment exert a synergistic effect during experimental  
815 *Trypanosoma cruzi* infection? *J Pineal Res.* 47(3):253-9.
- 816 36. Frénal K, Polonais V, Marq JB, Stratmann R, Limenitakis J, Soldati-Favre D. 2010.  
817 Functional Dissection of the Apicomplexan Glideosome Molecular Architecture. *Cell*  
818 *Host Microbe.* 8(4):343–57.
- 819 37. Skillman KM, Daher W, Ma IC, Soldati-Favre D, Sibley D. 2012. *Toxoplasma*  
820 *gondii* profilin acts primarily to sequester G-actin while formins efficiently nucleate  
821 actin filament formation in vitro. *Biochemistry.* 51(12):2486–95.
- 822 38. Rugarabamu G, Marq JB, Guérin A, Lebrun M, Soldati-Favre D. 2015. Distinct  
823 contribution of *Toxoplasma gondii* rhomboid proteases 4 and 5 to micronemal protein  
824 protease 1 activity during invasion. *Mol Microbiol.* 97(2):244–62.
- 825 39. Zhao Y, Marple AH, Ferguson DJ, Bzik DJ, Yap GS. 2014. Avirulent strains of  
826 *Toxoplasma gondii* infect macrophages by active invasion from the phagosome. *Proc*  
827 *Natl Acad Sci U S A.* 111(17):6437-42.
- 828 40. Alaganan A, Fentress SJ, Tang K, Wang Q, Sibley LD. 2014. *Toxoplasma* GRA7  
829 effector increases turnover of immunity-related GTPases and contributes to acute  
830 virulence in the mouse. *Proc Natl Acad Sci U S A.* 111(3): 1126–31.
- 831 41. Díaz-Martín RD, Mercier C, Gómez de León CT, González RM, Pozos SG, Ríos-  
832 Castro E, Arguello García R, Fox BA, Bzik DJ, Mondragón Flores R. 2019. The dense  
833 granule protein 8 (GRA8) is a component of the sub-pellicular cytoskeleton in  
834 *Toxoplasma gondii*. *Parasitol Res.* 118(6):1899-1918.
- 835 42. Bullen HE, Bisio H, Soldati-Favre D. 2019. The triumvirate of signaling molecules  
836 controlling *Toxoplasma* microneme exocytosis: Cyclic GMP, calcium, and phosphatidic  
837 acid. *PLoS Pathog.* 15(5):e1007670.
- 838 43. Mouveaux T, Oria G, Werkmeister E, Slomianny C, Fox BA, Bzik DJ, Tomavo S.  
839 2014. Nuclear glycolytic enzyme enolase of *Toxoplasma gondii* functions as a  
840 transcriptional regulator. *PLoS One.* 9(8):e105820.
- 841 44. Lunghi M, Galizi R, Magini A, Carruthers VB, Di Cristina M. 2015. Expression of  
842 the glycolytic enzymes enolase and lactate dehydrogenase during the early phase of  
843 *Toxoplasma* differentiation is regulated by an intron retention mechanism. *Mol*  
844 *Microbiol.* 96(6):1159–75.
- 845 45. Song Y, DiMaio F, Wang RY, Kim D, Miles C, Brunette T, Thompson J, Baker D.  
846 2013. High-resolution comparative modeling with RosettaCM. *Structure.* 21(10):1735-  
847 42.

- 848 46. Kabe Y, Nakane T, Koike I, Yamamoto T, Sugiura Y, Harada E, Sugase K,  
849 Shimamura T, Ohmura M, Muraoka K, Yamamoto A, Uchida T, Iwata S, Yamaguchi  
850 Y, Krayukhina E, Noda M, Handa H, Ishimori K, Uchiyama S, Kobayashi T, Suematsu  
851 M. 2016. Haem-dependent dimerization of PGRMC1/Sigma-2 receptor facilitates  
852 cancer proliferation and chemoresistance. *Nat Commun.* **7**, 11030
- 853 47. Pettersen EF, Goddard TD, Huang CC, Couch GS, Greenblatt DM, Meng EC,  
854 Ferrin TE. 2004. UCSF Chimera--a visualization system for exploratory research and  
855 analysis. *J Comput Chem.* 25(13):1605-12.
- 856 48. Webb B, Sali A. 2016. Comparative Protein Structure Modeling Using  
857 MODELLER. *Curr Protoc Bioinformatics.* 54:5.6.1-5.6.37.
- 858 49. Williams CJ, Headd JJ, Moriarty NW, Prisant MG, Videau LL, Deis LN, Verma V,  
859 Keedy DA, Hintze B, Chen VB, Jain S, Lewis SM, Arendall 3<sup>rd</sup> WB, Snoeyink J,  
860 Adams PD, Lovell SC, Richardson JS, Richardson DC. 2018. MolProbity: More and  
861 better reference data for improved all-atom structure validation. *Protein Sci.* 27(1):293-  
862 315.
